# Supplementary material
Source: publisher figshare collection journal article supplement (https://frontiersin.figshare.com/ndownloader/files/13245665)
Supplement: Supplementary file [file 13245665]

**Supplementary Table S3.** *In silico* analysis of miRNA targets among the selected gene families, validated by PARE analysis.

| Target ID                                                | Presence in PARE library | miRNA family by psRNA Target finder | Target start | Target end | Target Site Location (target/total exons) |
|----------------------------------------------------------|--------------------------|-------------------------------------|--------------|------------|-------------------------------------------|
| Squamosa promoter binding proteins (EPIGT00820000103254) |                          |                                     |              |            |                                           |
| Solyc02g077920                                           | ✓                        | miR156                              | 830          | 849        | 3' UTR                                    |
| Solyc04g045560                                           | ✓                        | miR156                              | 788          | 808        | exon 4/4*                                 |
| Solyc05g012040                                           | ✓                        | miR156                              | 1419         | 1439       | exon 4/5                                  |
| Solyc05g015510                                           | ✓                        | miR156                              | 2951         | 2971       | exon 4/4                                  |
| Solyc05g015840                                           | ✓                        | miR156/168                          | 749/614      | 769/633    | exon 3/3                                  |
| Solyc10g009080                                           | ✓                        | miR156                              | 797          | 816        | 3' UTR                                    |
| Solyc10g078700                                           | ✓                        | miR156                              | 764          | 784        | exon 3/3*                                 |
| Solyc01g068100                                           |                          | -                                   | -            | -          | -                                         |
| Solyc01g080670                                           |                          | miR9472                             | 873          | 892        | exon 2/10                                 |
| Solyc01g090730                                           |                          | -                                   | -            | -          | -                                         |
| Solyc03g114850                                           |                          | miR156                              | 1472         | 1491       | 3' UTR                                    |
| Solyc05g053240                                           |                          | -                                   | -            | -          | -                                         |
| Solyc07g053810                                           |                          | -                                   | -            | -          | -                                         |
| Solyc07g062980                                           |                          | miR156                              | 439          | 458        | 3' UTR                                    |
| Solyc10g018780                                           |                          | -                                   | -            | -          | -                                         |
| Solyc12g038520                                           |                          | miR156                              | 971          | 991        | exon 3/3*                                 |
| Auxin response factors (EPIGT00850000106226)             |                          |                                     |              |            |                                           |
| Solyc06g075150                                           | ✓                        | -                                   | -            | -          | -                                         |
| Solyc09g007810                                           | ✓                        | miR160                              | 1597         | 1617       | exon 3/4                                  |
| Solyc11g069500                                           | ✓                        | miR160                              | 1303         | 1322       | exon 2/4                                  |
| Solyc05g056040                                           |                          | -                                   | -            | -          | -                                         |
| Solyc10g086130                                           |                          | miR160                              | 1368         | 1388       | exon 2/2                                  |
| Solyc11g013480                                           |                          | -                                   | -            | -          | -                                         |
| Homeobox-leucine zipper proteins (EPIGT00140000000795)   |                          |                                     |              |            |                                           |
| Solyc02g024070                                           | ✓                        | miR166                              | 809          | 828        | boundary exons 4-5/18                     |
| Solyc03g120910                                           | ✓                        | miR166                              | 849-850      | 869        | boundary exons 4-5/18                     |
| Solyc08g066500                                           | ✓                        | miR390                              | 39           | 58         | boundary 5' UTR-exon 1/18                 |
| Solyc11g069470                                           | ✓                        | miR166                              | 560-561      | 580        | boundary exons 4-5/18                     |
| Solyc12g044410                                           | ✓                        | miR166                              | 548-549      | 568        | boundary exons 4-5/18                     |
| Solyc01g057960                                           |                          | -                                   | -            | -          | -                                         |
| Solyc02g069830                                           |                          | miR166                              | 619          | 638        | boundary exons 6-7/20                     |
| Argonautes (EPIGT00820000103293)                         |                          |                                     |              |            |                                           |
| Solyc03g098280**                                         | ✓                        | miR168                              | 24           | 43         | -                                         |
| Solyc06g072300                                           | ✓                        | miR168                              | 2107-2108    |            | 2127 exon 1/21                            |
| Solyc01g008960                                           |                          | -                                   | -            | -          | -                                         |
| Solyc01g010970                                           |                          | -                                   | -            | -          | -                                         |
| Solyc01g096750                                           |                          | -                                   | -            | -          | -                                         |
| Solyc02g069260                                           |                          | miR403                              | 2108         | 2127       | exon 3/3                                  |
| Solyc02g069270                                           |                          | -                                   | -            | -          | -                                         |
| Solyc02g069280                                           |                          | -                                   | -            | -          | -                                         |
| Solyc03g111760                                           |                          | -                                   | -            | -          | -                                         |
| Solyc06g073530                                           |                          | -                                   | -            | -          | -                                         |
| Solyc06g073540                                           |                          | -                                   | -            | -          | -                                         |
| Solyc06g074730                                           |                          | -                                   | -            | -          | -                                         |
| Solyc07g049500                                           |                          | -                                   | -            | -          | -                                         |
| Solyc09g082830                                           |                          | -                                   | -            | -          | -                                         |
| Solyc12g006790                                           |                          | -                                   | -            | -          | -                                         |

Nuclear transcription factors (HAP) (EPIGT00140000000465)

|                |   |        |      |      |        |
|----------------|---|--------|------|------|--------|
| Solyc01g006930 | ✓ | miR169 | 1317 | 1337 | 3' UTR |
| Solyc01g087240 | ✓ | miR169 | 1160 | 1180 | 3' UTR |
| Solyc08g062210 | ✓ | miR169 | 1101 | 1120 | 3' UTR |
| Solyc01g008490 |   | miR169 | 1058 | 1077 | 3' UTR |
| Solyc02g069860 |   | -      | -    | -    | -      |
| Solyc03g121940 | ✓ | miR169 | 1022 | 1041 | 3' UTR |
| Solyc10g079150 |   | -      | -    | -    | -      |
| Solyc10g081840 |   | -      | -    | -    | -      |
| Solyc11g065700 |   | -      | -    | -    | -      |
| Solyc12g009050 |   | -      | -    | -    | -      |

Transcription factors (AP, RAP) (EPIGT00850000106232)

|                |   |        |           |           |             |
|----------------|---|--------|-----------|-----------|-------------|
| Solyc02g064960 | ✓ | miR172 | 1733-1735 | 1753-1755 | exon 10/10  |
| Solyc02g093150 | ✓ | miR172 | 1561-1563 | 1581-1583 | exon 10/10  |
| Solyc04g049800 | ✓ | miR172 | 1106-1108 | 1126-1128 | exon 9/9    |
| Solyc09g007260 | ✓ | miR172 | 1512-1514 | 1532-1534 | exon 9/9    |
| Solyc11g072600 | ✓ | miR172 | 1277-1278 | 1297-1299 | exon 9/9*   |
| Solyc03g044300 |   | miR172 | 1373-1375 | 1393-1395 | exon 9/9    |
| Solyc06g075510 |   | miR172 | 1511-1513 | 1531-1533 | exon 10/10  |
| Solyc10g084340 |   | miR172 | 1242      | 1261-1262 | exon 10/10* |

Disease resistance proteins (EPIGT00820000103688)

|                |   |                    |             |             |                                 |
|----------------|---|--------------------|-------------|-------------|---------------------------------|
| Solyc05g008070 | ✓ | miR6024/miR482     | 543-544/528 | 563-564/549 | exon 1/2*                       |
| Solyc01g017690 |   | -                  | -           | -           | -                               |
| Solyc01g087200 |   | miR6024/miR482     | 532-533/516 | 552-553/536 | exon 2/3 / boundary exons 1-2/3 |
| Solyc01g103610 |   | -                  | -           | -           | -                               |
| Solyc04g007080 |   | -                  | -           | -           | -                               |
| Solyc04g007090 |   | -                  | -           | -           | -                               |
| Solyc04g011890 |   | -                  | -           | -           | -                               |
| Solyc04g011960 |   | -                  | -           | -           | -                               |
| Solyc04g011980 |   | -                  | -           | -           | -                               |
| Solyc04g011990 |   | -                  | -           | -           | -                               |
| Solyc04g012000 |   | -                  | -           | -           | -                               |
| Solyc04g012010 |   | -                  | -           | -           | -                               |
| Solyc06g062440 |   | -                  | -           | -           | -                               |
| Solyc07g005770 |   | -                  | -           | -           | -                               |
| Solyc07g009180 |   | miR6024            | 553-554     | 574         | exon 1/1*                       |
| Solyc07g009190 |   | -                  | -           | -           | -                               |
| Solyc07g009200 |   | -                  | -           | -           | -                               |
| Solyc07g049700 |   | miR482             | 544         | 565         | exon 1/1*                       |
| Solyc08g074250 |   | -                  | -           | -           | -                               |
| Solyc10g008230 |   | miR6024            | 511-512     | 531         | exon 1/3*                       |
| Solyc10g008240 |   | miR6024            | 511-512     | 531-532     | exon 1/2*                       |
| Solyc10g051050 |   | -                  | -           | -           | -                               |
| Solyc11g006520 |   | miR6024/<br>miR482 | 526-527/511 | 546-547/532 | exon 2/3                        |
| Solyc11g006530 |   | miR482             | 526         | 547         | exon 2/4*                       |
| Solyc11g006630 |   | miR6024/<br>miR482 | 547-548/532 | 567-568/553 | exon 2/3                        |
| Solyc11g006640 |   | miR6024            | 547-548     | 567-568     | exon 2/4                        |
| Solyc11g020080 |   | -                  | -           | -           | -                               |
| Solyc11g020100 |   | miR482             | 520         | 541         | exon 1/3*                       |
| Solyc11g069020 |   | miR6024            | 571-572     | 591-592     | exon 1/1*                       |
| Solyc12g017730 |   | -                  | -           | -           | -                               |
| Solyc12g017800 |   | miR482             | 526         | 547         | exon 2/4*                       |
| Solyc12g017810 |   | -                  | -           | -           | -                               |

\*unknown UTR

\*\*synonym of NM\_001279332.2
